# Supplementary material for: On-surface synthesis and characterization of teranthene and hexanthene: ultrashort graphene nanoribbons with mixed armchair and zigzag edges
Source: Royal Society of Chemistry journal article supplement (doi:10.1039/d3nr03736c), 2023-01-01
Supplement: d3nr03736c1.pdf [file d3nr03736c1.pdf]

## Supporting Information

### *On-surface synthesis and characterization of Teranthene and Hexanthene: Ultrashort graphene nanoribbons with mixed armchair and zigzag edges*

Gabriela Borin Barin<sup>1\*</sup>, Marco Di Giovannantonio<sup>1\*+</sup>, Thorsten G. Lohr<sup>2\*</sup>, Shantanu Mishra<sup>1++</sup>, Amogh Kinikar<sup>1</sup>, Mickael L. Perrin<sup>3,4</sup>, Jan Overbeck<sup>3</sup>, Michel Calame<sup>3,5,6</sup>, Xinliang Feng<sup>2,7</sup>, Roman Fasel<sup>1,8</sup> and Pascal Ruffieux<sup>1</sup>

<sup>1</sup>nanotech@surfaces Laboratory, Empa, Swiss Federal Laboratories for Materials Science and Technology, 8600 Dübendorf, Switzerland

<sup>2</sup>Center for Advancing Electronics Dresden, Department of Chemistry and Food Chemistry, TU Dresden, Dresden 01062, Germany

<sup>3</sup>Transport at Nanoscale Interfaces Laboratory, Empa, Swiss Federal Laboratories for Materials Science and Technology, 8600 Dübendorf, Switzerland

<sup>4</sup>Department of Information Technology and Electrical Engineering, ETH Zurich, 8092 Zurich, Switzerland

<sup>5</sup>Department of Physics, University of Basel, Klingelbergstrasse 82, CH-4056 Basel, Switzerland

<sup>6</sup>Swiss Nanoscience Institute, University of Basel, Klingelbergstrasse 82, CH-4056 Basel, Switzerland

<sup>7</sup>Max Planck Institute of Microstructure Physics, Weinberg 2, 06120 Halle, Germany

<sup>8</sup>Department of Chemistry, Biochemistry and Pharmaceutical Sciences, University of Bern, 3012 Bern, Switzerland

<sup>+</sup>Present address: Istituto di Struttura della Materia – CNR (ISM-CNR), via Fosso del Cavaliere 100, Roma 00133, Italy

<sup>++</sup>Present address: IBM Research – Zurich, Rüschlikon 8803, Switzerland

\*These authors contributed equally to this work

### **Precursor synthesis and characterization**

Unless otherwise stated, commercially available starting materials, catalysts, reagents, and dry solvents were used without further purification. Reactions were performed using standard vacuum-line and Schlenk techniques. All the starting materials were obtained from Sigma Aldrich, or TCI. Catalysts were purchased from Strem. Column chromatography was performed on silica (SiO<sub>2</sub>, particle size 0.063–0.200 mm, purchased from VWR). Silica-coated aluminum sheets with a fluorescence indicator (TLC silica gel 60 F<sub>254</sub>, purchased from Merck KGaA) were used for thin layer chromatography.

MALDI-TOF spectra were recorded on a Bruker Autoflex Speed MALDI-TOF MS (Bruker Daltonics, Bremen, Germany). All of the samples were prepared by mixing the analyte and the matrix, 1,8-dihydroxyanthracen-9(10H)-one (dithranol, purchased from Fluka Analytical, purity >98%) in the solid state.

NMR data were recorded on a Bruker AV-II 300 spectrometer operating at 300 MHz for  $^1\text{H}$  and 75 MHz for  $^{13}\text{C}$  with standard Bruker pulse programs 333 K. Chemical shifts ( $\delta$ ) are reported in ppm. Coupling constants ( $J$ ) are reported in Hz. Tetrachloroethane- $\text{d}_2$  ( $\delta(^1\text{H}) = 5.91$  ppm,  $\delta(^{13}\text{C}) = 74.2$  ppm) was used as solvents. The following abbreviations are used to describe peak patterns as appropriate: s = singlet, d = doublet, t = triplet, q = quartet, and m = multiplet. Tetrachloroethane- $\text{d}_2$  (99.9 atom% D) was purchased from Euriso-top.

Melting points were determined on a Büchi Melting Point M-560 in a range of 50–400 °C with a temperature rate of 10 °Cmin $^{-1}$ .

### 10-bromo-9,9':10',9''-teranthracene (**1**)

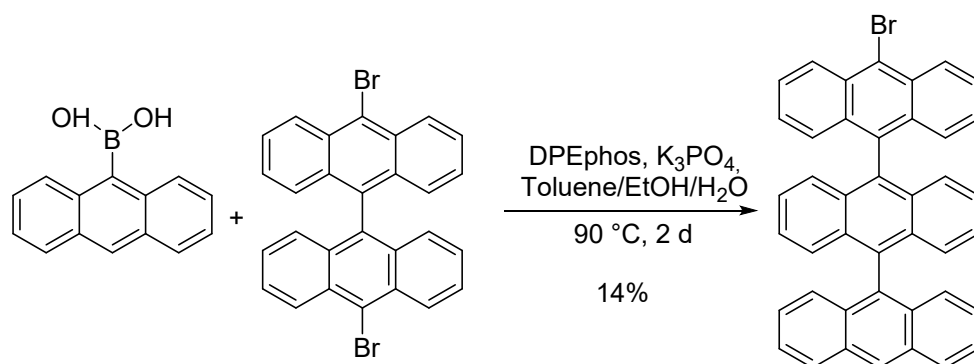

**Figure S1.** 10,10'-dibromo-9,9'-bianthracene (100 mg, 0,195 mmol), 9-anthraceneboronic acid (56.4 mg, 0.254 mmol, 1.3 eq.), tripotassium phosphate (207.2 mg, 0.976 mmol, 5.0 eq.), DPEphos (42 mg, 0.078 mmol, 0.4 eq.) and  $\text{Pd}_2(\text{dba})_3$  (42.1 mg, 0.078 mmol, 0.4 eq.) were added to a 50 ml schlenk flask and evacuated and refilled with argon three times. After adding the degassed solvents (5 ml toluene, 1 ml water and 0.6 ml ethanol), the reaction mixture was heated to 90 °C for 2 days. After quenching with water the product was extracted with DCM, washed with brine and dried over  $\text{MgSO}_4$ . The solvents were removed under vacuum. The crude material was purified by column chromatography (chloroform:isohexane = 1:5 to 1:1). After recrystallization (chloroform/MeOH) the title compound **1** was afforded in a yield of 14% (16 mg).

mp: > 400 °C;  $R_f$ : 0.30 (DCM:isohexane = 1:3);  $^1\text{H}$  NMR (300 MHz,  $\text{C}_2\text{D}_2\text{Cl}_4$ , 333 K)  $\delta$  (ppm) = 8.71 (d,  $J = 6.9$  Hz, 3H), 8.16 (d,  $J = 8.5$  Hz, 2H), 7.65 – 7.56 (m, 2H), 7.52 – 7.43 (m, 2H), 7.34 – 7.23 (m, 8H), 7.21 – 7.13 (m, 4H), 7.11 – 7.01 (m, 4H);  $^{13}\text{C}$  NMR (76 MHz,  $\text{C}_2\text{D}_2\text{Cl}_4$ , 333K)  $\delta$  (ppm) = 132.74, 131.91, 131.66, 128.97, 128.40, 127.79, 127.61, 127.30, 127.06, 126.68, 126.42, 126.00, 125.74; HR-MS (MALDI-TOF)  $m/z$ :  $[\text{M}^+]$  calcd for  $\text{C}_{42}\text{H}_{25}\text{Br}$ : 608.1130; found: 608.1128; error: -0.33 ppm.

## MALDI-TOF spectra

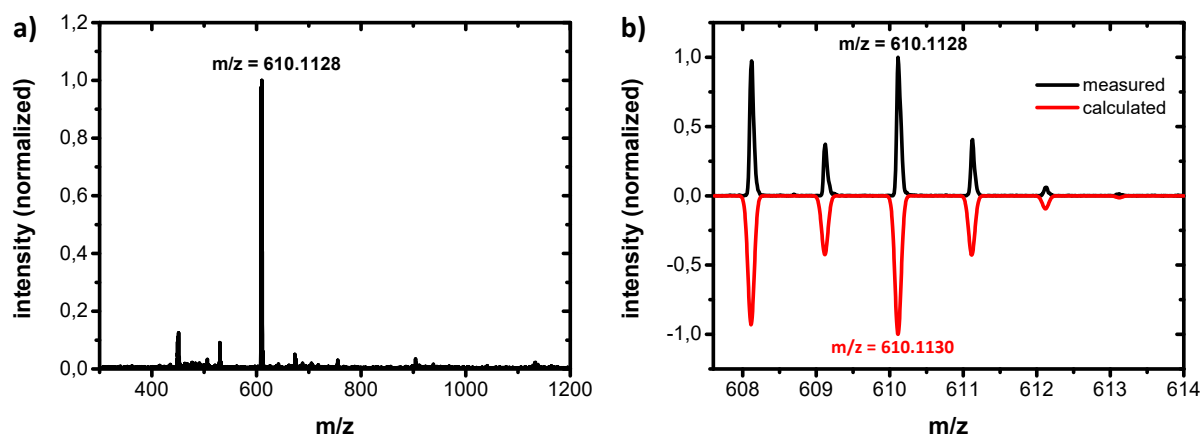

**Figure S2:** a) HR-MALDI-TOF spectrum of **1**; b) HR-MALDI-TOF magnified spectrum of **1** (black line) is in agreement to the expected isotopic distribution pattern (red line).

## NMR spectra

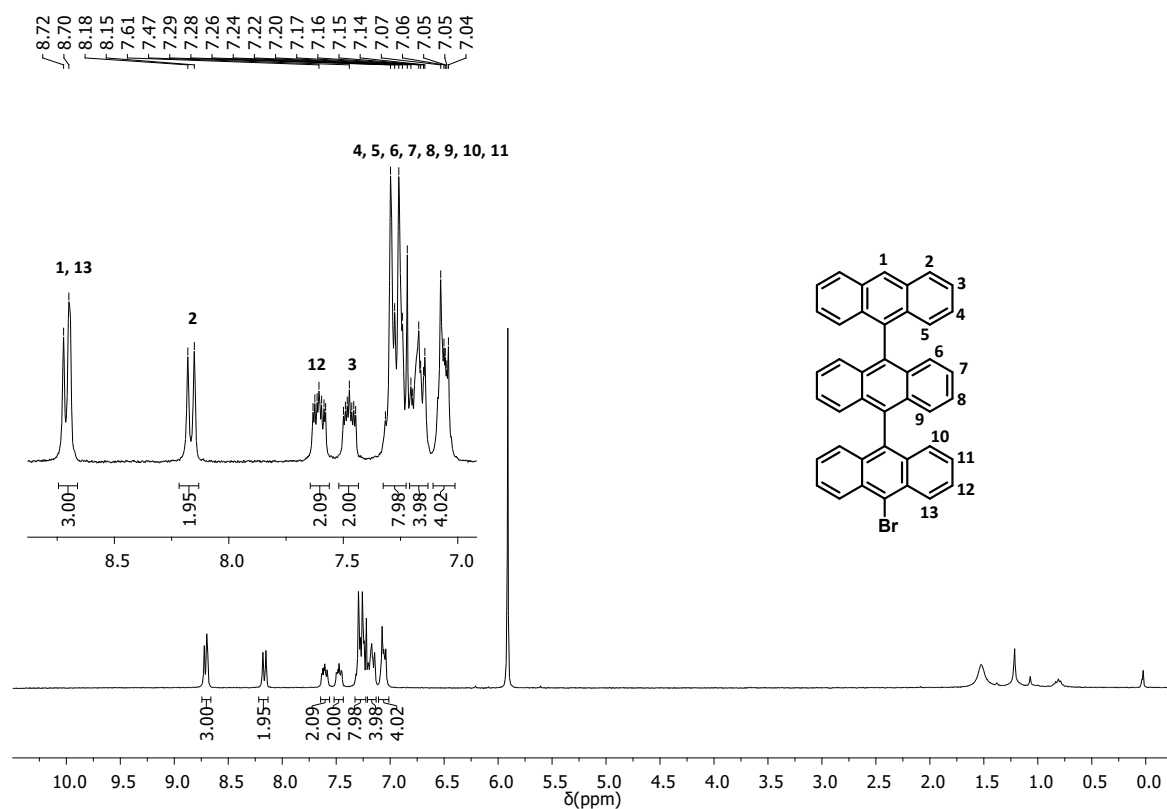

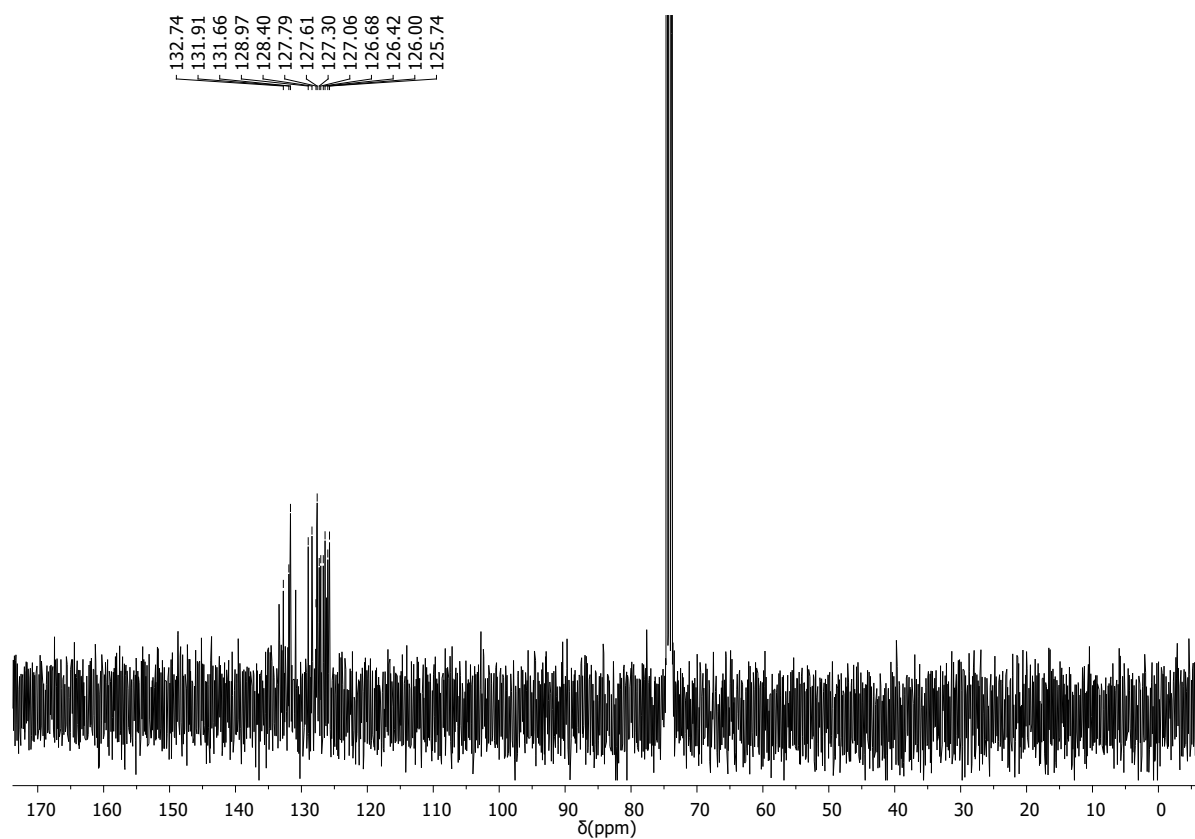

**Figure S3b:**  $^{13}\text{C}$ -NMR spectrum of **1** dissolved in tetrachloroethane- $\text{d}_2$ , 75 MHz, 333 K.

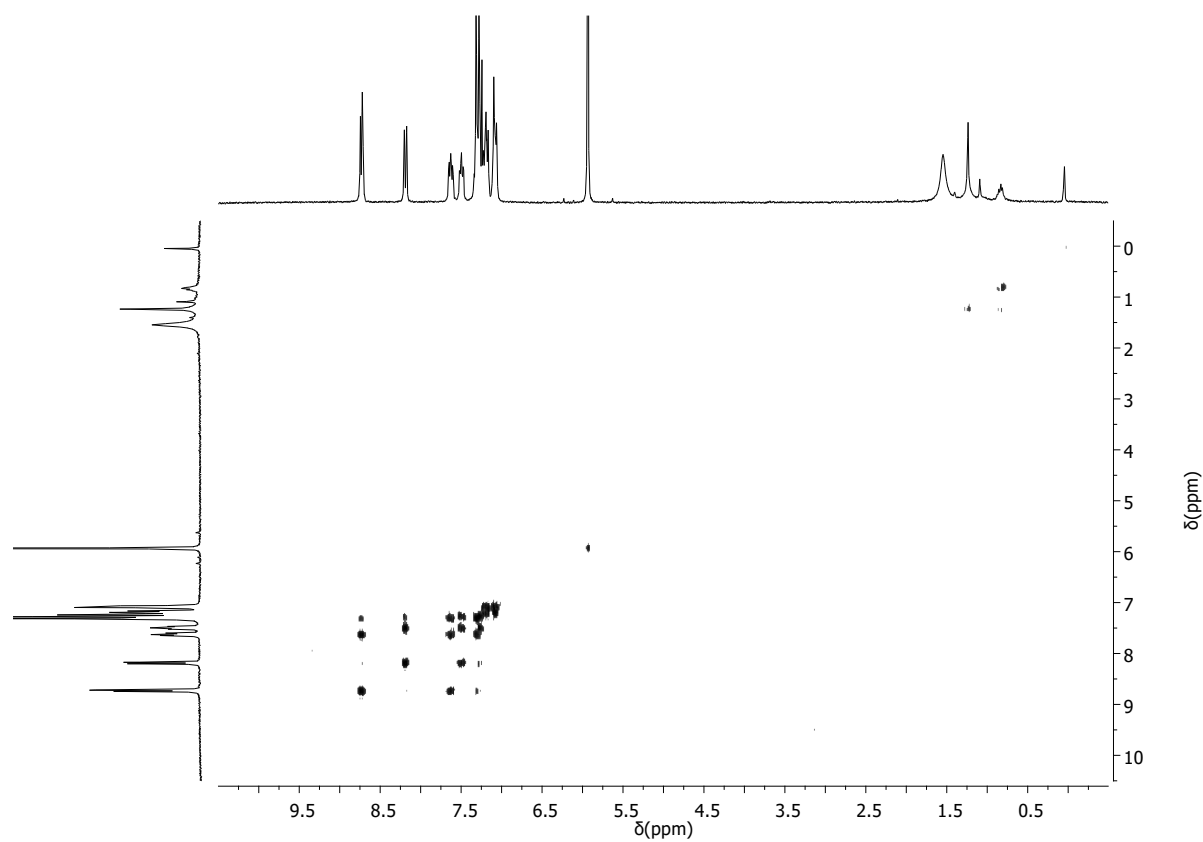

**Figure S3c:**  $^1\text{H}/^1\text{H}$ -COSY-NMR spectrum of **1** dissolved in tetrachloroethane- $\text{d}_2$ , 300 MHz, 333 K.

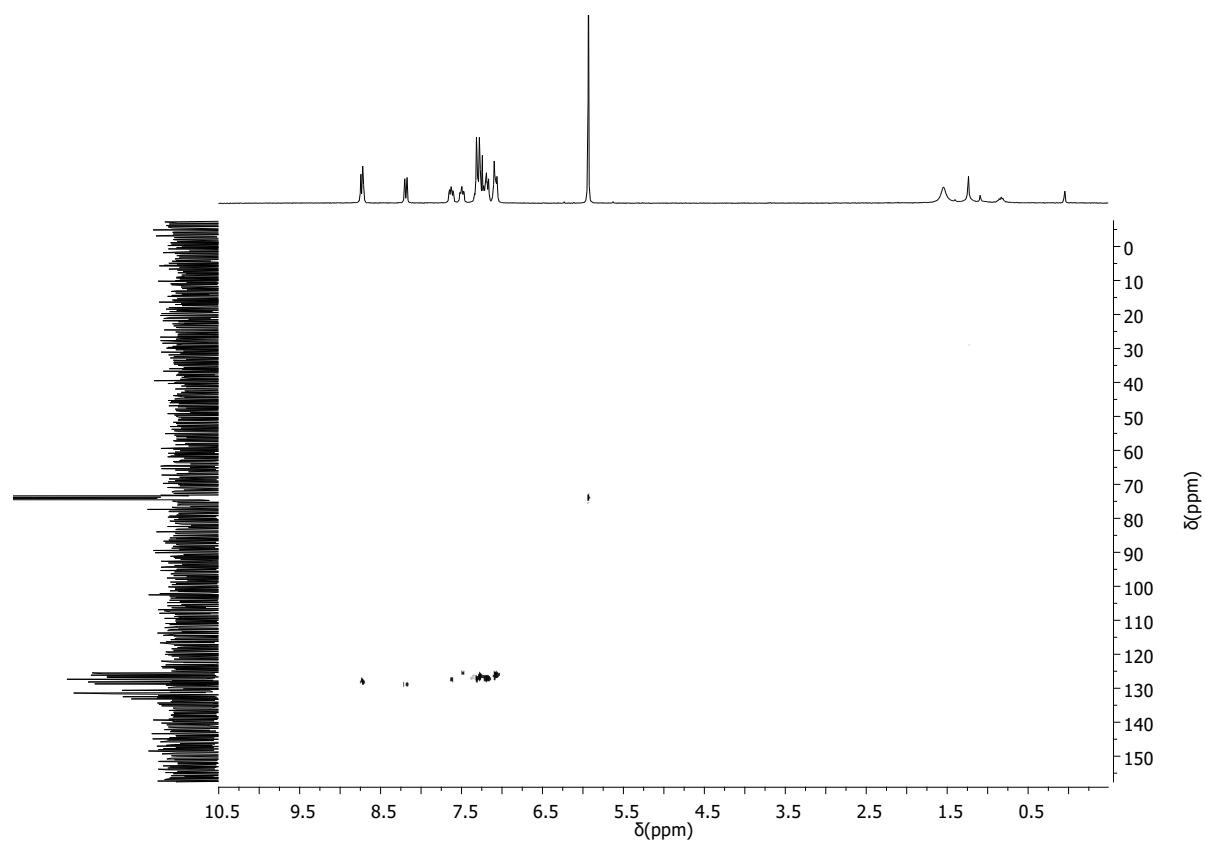

**Figure S3d:** HSQC-NMR spectrum of **1** dissolved in tetrachloroethane- $d_2$ , 75 MHz, 333 K.

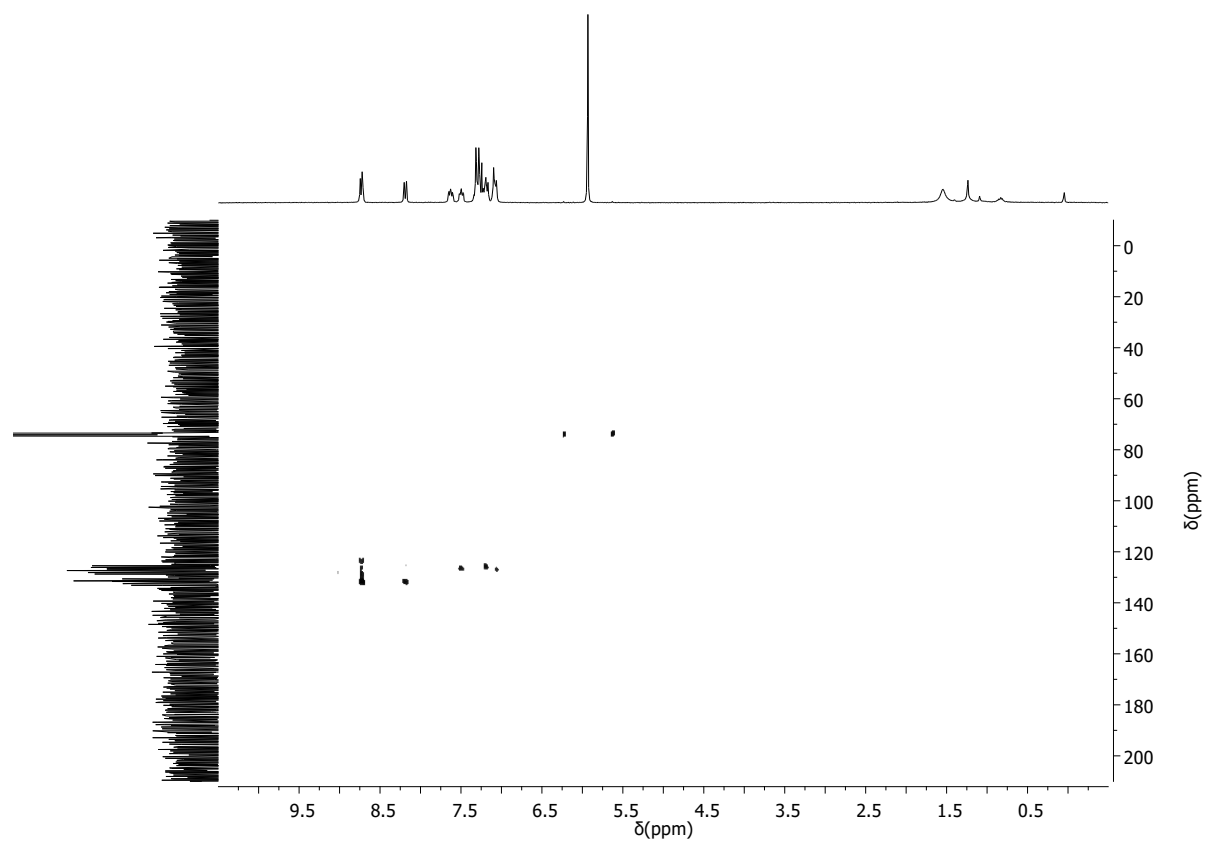

**Figure S3e:** HMBC-NMR spectrum of **1** dissolved in tetrachloroethane- $d_2$ , 75 MHz, 333 K.

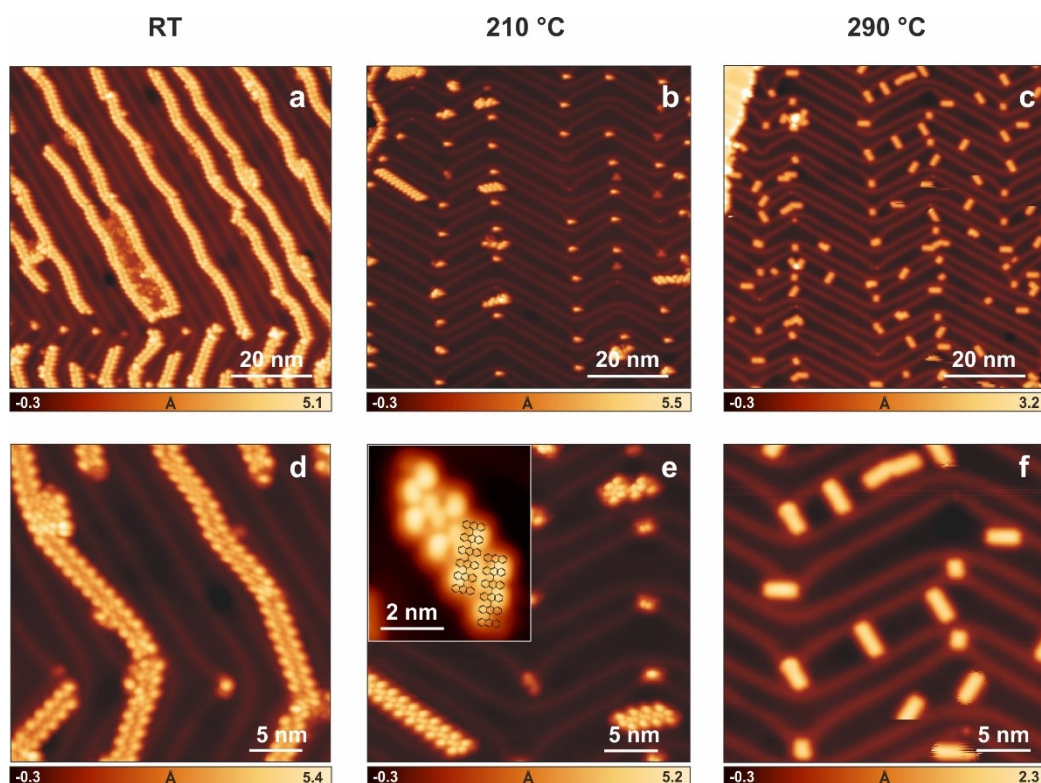

**Figure S4.** STM images of the Au(111) surface after deposition of precursor **1** at room temperature (RT), followed by successive annealing steps at the given temperatures (a-f). Inset (e): magnified STM image with superimposed chemical structures of the dimers after dehalogenative aryl-aryl coupling of **1** on the surface. Scanning parameters: a)  $V = -1.0$  V,  $I = 30$  pA, b)  $V = -1.0$  V,  $I = 30$  pA, c)  $V = -1.0$  V,  $I = 20$  pA, d)  $V = -0.5$  V,  $I = 30$  pA, e)  $V = -0.3$  V,  $I = 30$  pA, f)  $V = -1$  V,  $I = 20$  pA.

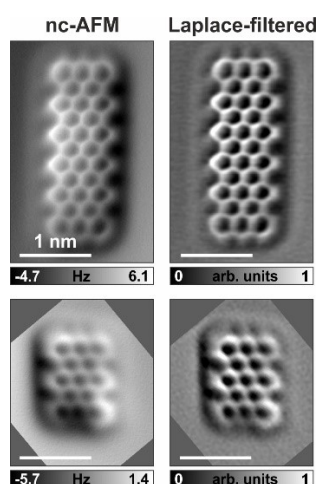

**Figure S5.** Left panels: nc-AFM frequency-shift images of **HA** (upper panel) and **TA** (lower panel). Scanning parameters: (top) tip height offset  $\Delta z = 195$  pm above the STM setpoint  $V = -5$  mV,  $I = 100$  pA, (bottom)  $\Delta z = 190$  pm above the STM setpoint  $V = -5$  mV,  $I = 100$  pA. Right panels: Corresponding Laplace-filtered versions of the left panels (also shown in Fig. 1).

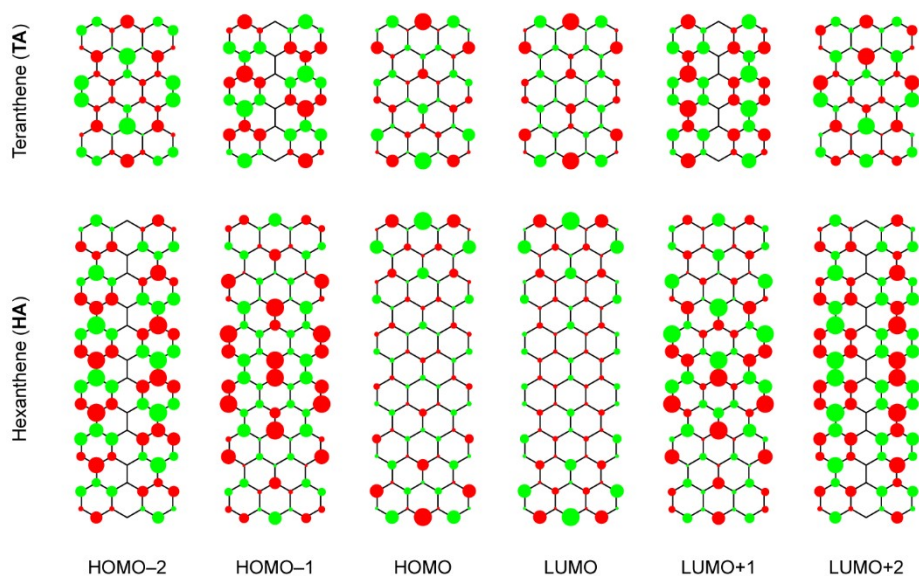

**Figure S6.** TB wave functions of HOMO-2 to LUMO+2 of TA (top) and HA (bottom). Size of the filled circles denotes amplitude of the wave function, while the two colors denote opposite phases of the wave function.

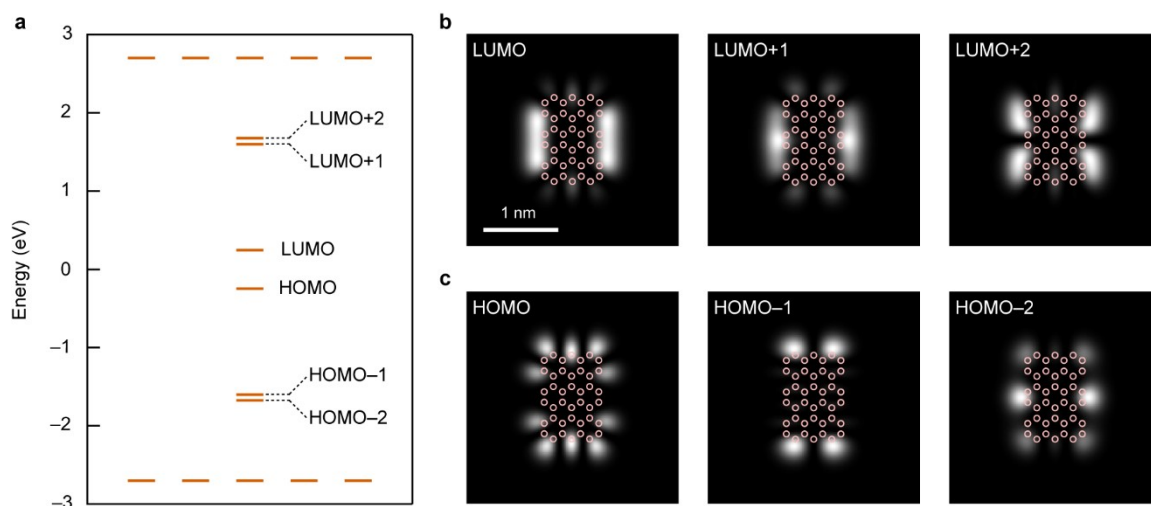

**Figure S7.** TB calculations on TA. (a) Gas phase TB energy spectrum of TA between  $\pm 3$  eV. HOMO-2 to LUMO+2 states are labeled. The calculated frontier gap of TA is  $\sim 0.5$  eV at nearest-neighbor TB level of theory. (b, c) TB-LDOS maps of the labeled states in (a) for the unoccupied (b) and occupied (c) channels. The carbon backbone of TA (colored circles) is superimposed as a guide to the eye. The maps are calculated at a height of  $7 \text{ \AA}$  above the molecular plane.

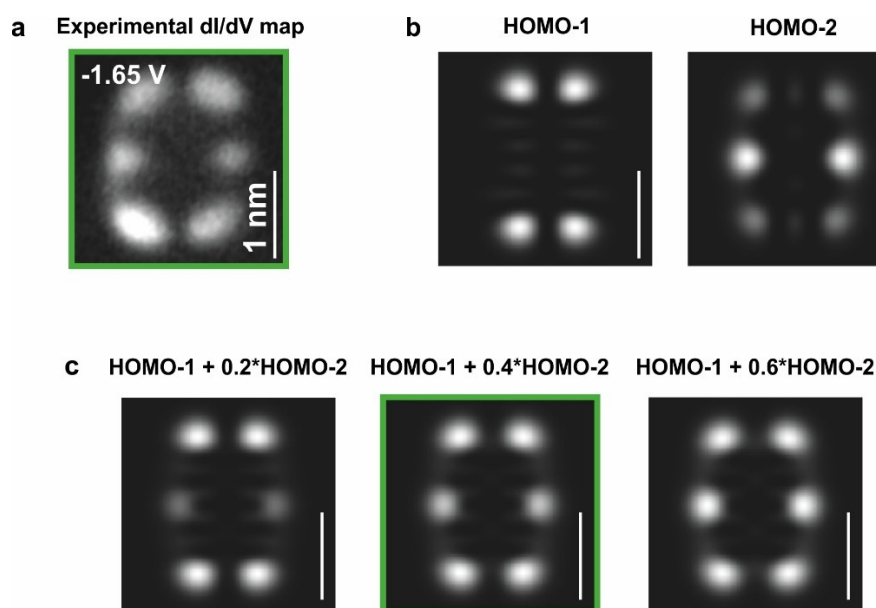

**Figure S8.** Intermixing of HOMO-1 and HOMO-2 states of TA. (a)  $dI/dV$  map of the resonance at  $-1.65$  V. (b) TB-LDOS maps of the HOMO-1 and HOMO-2 of TA. The  $dI/dV$  map at  $-1.65$  V contains features that are characteristic of both orbitals – that is, strong LDOS features at the termini (characteristic of HOMO-1, and to some extent, also HOMO-2) and slightly weaker LDOS features at the center of the armchair edges (characteristic of HOMO-2 exclusively). As shown in (c), mixing of the HOMO-2 LDOS (with a weight of 0.4) into the HOMO-1 LDOS clearly reproduces our experimental observation. The TB-LDOS maps are calculated at a height of  $7$  Å above the molecular plane.

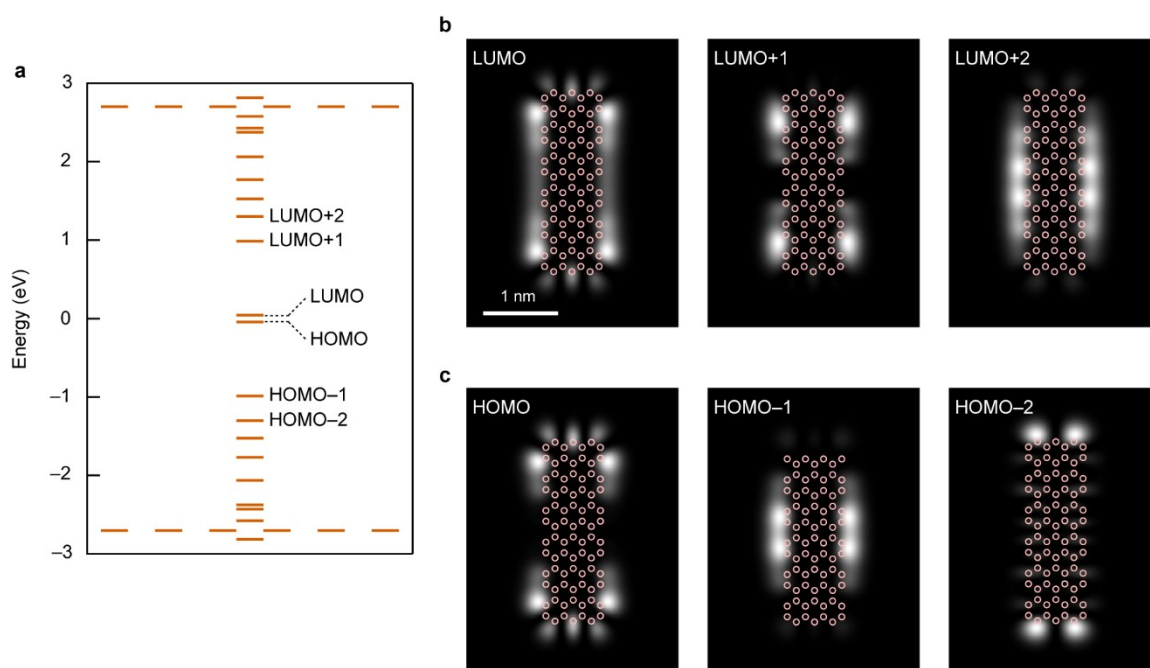

**Figure S9.** TB calculations on HA. (a) Gas phase TB energy spectrum of HA between  $\pm 3$  eV. HOMO-2 to LUMO+2 states are labeled. The calculated frontier gap of HA is  $\sim 90$  meV at nearest-neighbor TB level of theory, much less than that of TA at the same level of theory (Fig.



S7). (b, c) TB-LDOS maps of the labeled states in (a) for the unoccupied (b) and occupied (c) channels. The carbon backbone of **HA** (colored circles) is superimposed as a guide to the eye. The maps are calculated at a height of 7 Å above the molecular plane.

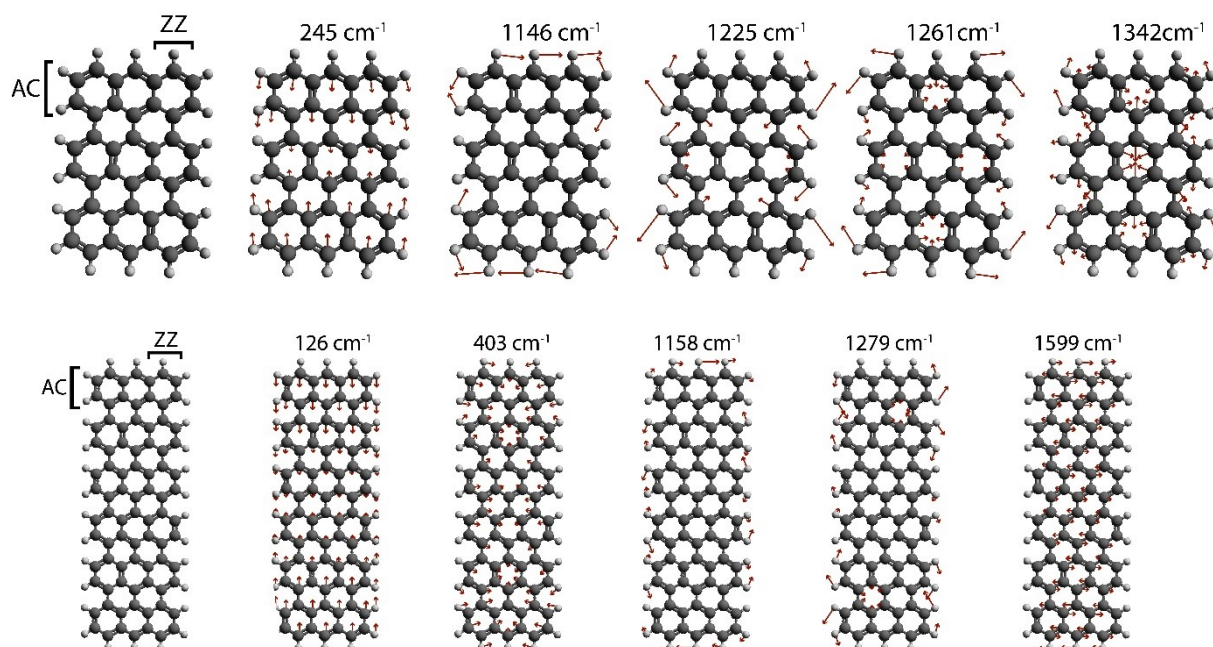

**Figure S10:** Raman normal mode analysis of teranthene (**TA**) (upper panel) and hexanthene (**HA**) (lower panel). Red arrows indicate amplitude and direction of atomic displacements.

- Modes at 245 and 126  $\text{cm}^{-1}$ : longitudinal compressive mode (LCM)
- Mode at 403  $\text{cm}^{-1}$ : radial breathing-like mode (RBLM)
- Modes at 1146 and 1158  $\text{cm}^{-1}$ : CH-bending of zigzag edges
- Modes at 1225, 1261 and 1279  $\text{cm}^{-1}$ : CH-bending armchair edges
- Mode at 1342  $\text{cm}^{-1}$ : D mode
- Mode at 1599: G mode

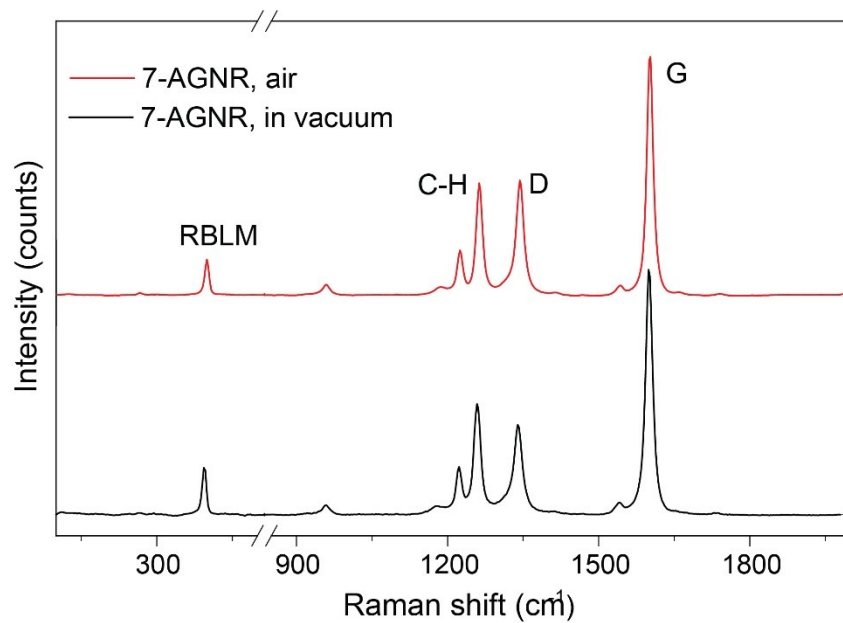

**Figure S11.** Raman spectroscopy of long 7-AGNRs in ultra-high vacuum (in black) and in air (in red) measured with 532 nm laser energy.

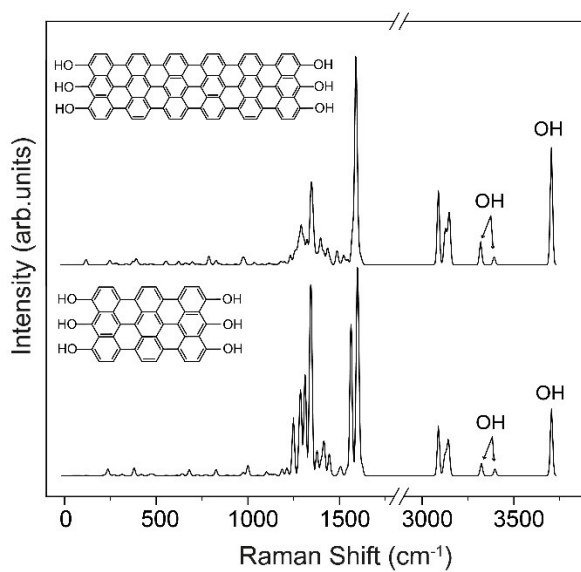

**Figure S12.** Simulated Raman spectra of HA and TA with OH-terminated zigzag edges.
